# Supplementary material
Source: Springer Nature journal article supplement (https://www.springermedizin.de/resource/supplementary/12888_2012_1117_MOESM1_ESM.pdf/9479212)

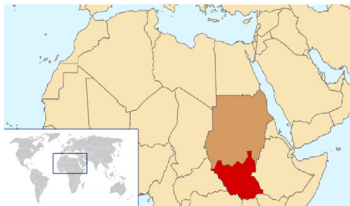

South Sudan.

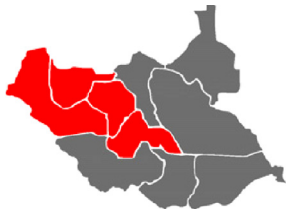

The Greater Bahr al Ghazal region.

Source: wikipedia

Supplement: MOESM1 [file 9479212]
